# Supplementary material
Source: MDPI journal article supplement (https://www.mdpi.com/2227-9717/11/6/1694)
Supplement: s1 [file s1]

*Supplementary Materials*

# A Comprehensive Study on the Acidic Compounds in Gas and Particle Phases of Mainstream Cigarette Smoke

Xinbo Lu <sup>1,2,†</sup>, Hongfei Zhang <sup>3,†</sup>, Yifeng Cao <sup>2,\*</sup>, Yongqiang Pang <sup>3</sup>, Guojun Zhou <sup>1</sup>, Hua Huang <sup>1</sup>, Jing Li <sup>2</sup>, Jian Jiang <sup>1,\*</sup> and Qiwei Yang <sup>2</sup>

<sup>1</sup> China Tobacco Zhejiang Industrial Co., Ltd., Hangzhou 310024, China; luxb@zjtobacco.com (X.L.); zhougj@zjtobacco.com (G.Z.); huangh@zjtobacco.com (H.H.)

<sup>2</sup> Key Laboratory of Biomass Chemical Engineering of Ministry of Education, College of Chemical and Biological Engineering, Zhejiang University, Hangzhou 310058, China; lijing1006@zju.edu.cn (J.L.); yangqw@zju.edu.cn (Q.Y.)

<sup>3</sup> China National Tobacco Quality Supervision & Test Center, Zhengzhou 450001, China; hfzhang1983@126.com (H.Z.); pangyq2726@163.com (Y.P.)

\* Correspondence: caoyf@zju.edu.cn (Y.C.); jiangj@zjtobacco.com (J.J.)

† These authors contributed equally to this work.

**Table S1.** Contents of the identified acids in the particulate phase ( $\mu\text{g}/\text{mg}$  tar).

| Compounds                    | L1       | L2       | L3       | L4       | L5       | M1       | M2       | M3       | M4       | <i>p</i>     |
|------------------------------|----------|----------|----------|----------|----------|----------|----------|----------|----------|--------------|
| formic acid                  | 5.21E+00 | 3.80E+00 | 3.67E+00 | 3.51E+00 | 3.44E+00 | 3.93E+00 | 3.77E+00 | 3.78E+00 | 3.16E+00 | 5.28E-01     |
| acetic acid                  | 9.20E+00 | 6.04E+00 | 6.80E+00 | 7.23E+00 | 6.50E+00 | 7.45E+00 | 6.92E+00 | 6.15E+00 | 5.26E+00 | 3.75E-01     |
| acrylic acid                 | 1.04E+00 | 7.54E-01 | 8.15E-01 | 6.97E-01 | 7.75E-01 | 1.06E+00 | 1.00E+00 | 9.30E-01 | 7.70E-01 | 1.89E-01     |
| propionic acid               | 7.77E-01 | 5.55E-01 | 6.24E-01 | 5.97E-01 | 6.72E-01 | 7.37E-01 | 6.69E-01 | 6.43E-01 | 5.14E-01 | 9.47E-01     |
| 2-methyl-propionic acid      | 7.68E-02 | 6.59E-02 | 6.73E-02 | 7.90E-02 | 7.18E-02 | 1.12E-01 | 1.01E-01 | 1.02E-01 | 7.99E-02 | 4.92E-03 **  |
| 2-methyl-butyric acid        | 6.59E-02 | 5.93E-02 | 6.08E-02 | 7.71E-02 | 5.91E-02 | 1.58E-01 | 1.46E-01 | 1.53E-01 | 1.19E-01 | 3.12E-05 *** |
| 2-ene-butyric acid           | 1.84E-01 | 1.32E-01 | 1.55E-01 | 1.92E-01 | 1.67E-01 | 2.14E-01 | 1.99E-01 | 2.00E-01 | 1.66E-01 | 9.79E-02     |
| 3-methyl-butyric acid        | 1.56E-01 | 1.38E-01 | 1.38E-01 | 1.68E-01 | 1.34E-01 | 2.44E-01 | 2.28E-01 | 2.43E-01 | 1.84E-01 | 1.02E-03 **  |
| valeric acid                 | 5.89E-02 | 4.82E-02 | 4.85E-02 | 5.63E-02 | 5.18E-02 | 7.18E-02 | 6.53E-02 | 6.84E-02 | 5.42E-02 | 2.16E-02 *   |
| 2-methyl-2-ene-butyric acid  | 4.73E-02 | 3.73E-02 | 4.02E-02 | 4.62E-02 | 4.05E-02 | 4.98E-02 | 4.53E-02 | 4.67E-02 | 3.64E-02 | 5.24E-01     |
| 2-pentenoic acid             | 4.33E-02 | 3.16E-02 | 3.55E-02 | 4.03E-02 | 3.48E-02 | 4.27E-02 | 3.98E-02 | 4.11E-02 | 3.21E-02 | 5.77E-01     |
| 3-methyl-pentanoic acid      | 6.16E-02 | 3.24E-02 | 3.52E-02 | 3.22E-02 | 3.80E-02 | 3.94E-01 | 3.63E-01 | 4.03E-01 | 2.77E-01 | 5.39E-06 *** |
| 4-methyl-pentanoic acid      | 4.46E-02 | 3.93E-02 | 3.16E-02 | 4.99E-02 | 3.60E-02 | 7.38E-02 | 6.87E-02 | 7.29E-02 | 5.68E-02 | 8.61E-04 *** |
| phenol                       | 9.60E-01 | 8.16E-01 | 7.83E-01 | 1.01E+00 | 8.47E-01 | 1.06E+00 | 9.86E-01 | 1.02E+00 | 8.41E-01 | 1.98E-01     |
| lactic acid                  | 2.49E+00 | 1.82E+00 | 1.91E+00 | 3.27E+00 | 2.77E+00 | 1.45E+00 | 1.40E+00 | 1.38E+00 | 1.19E+00 | 9.49E-03 **  |
| caproic acid                 | 8.66E-02 | 8.06E-02 | 7.00E-02 | 7.95E-02 | 6.91E-02 | 1.07E-01 | 9.29E-02 | 1.03E-01 | 8.14E-02 | 1.99E-02 *   |
| glycolic acid                | 1.21E+00 | 9.56E-01 | 8.63E-01 | 9.44E-01 | 6.92E-01 | 4.47E-01 | 4.19E-01 | 4.40E-01 | 4.18E-01 | 1.18E-03 **  |
| 2-carbonyl-propionic acid    | 9.56E-01 | 5.61E-01 | 6.96E-01 | 7.17E-01 | 6.00E-01 | 1.30E-01 | 1.25E-01 | 1.16E-01 | 9.47E-02 | 1.36E-04 *** |
| 2-hydroxy-butyric acid       | 1.59E-01 | 1.10E-01 | 1.16E-01 | 1.47E-01 | 1.31E-01 | 1.33E-01 | 1.29E-01 | 1.31E-01 | 1.03E-01 | 5.05E-01     |
| levulinic acid               | 5.23E-01 | 3.38E-01 | 3.63E-01 | 4.40E-01 | 3.83E-01 | 3.52E-01 | 3.19E-01 | 3.20E-01 | 2.50E-01 | 4.96E-02 *   |
| o-cresol                     | 2.28E-01 | 1.97E-01 | 1.87E-01 | 2.32E-01 | 2.13E-01 | 3.03E-01 | 2.78E-01 | 3.01E-01 | 2.41E-01 | 3.56E-03 **  |
| 2-furancarboxylic acid       | 1.38E+00 | 8.98E-01 | 9.32E-01 | 1.14E+00 | 8.89E-01 | 8.97E-01 | 8.09E-01 | 8.07E-01 | 6.68E-01 | 6.43E-02     |
| 3-hydroxy-propionic acid     | 1.98E+00 | 1.55E+00 | 1.72E+00 | 1.91E+00 | 1.77E+00 | 3.36E+00 | 3.51E+00 | 3.81E+00 | 3.12E+00 | 1.21E-05 *** |
| p-cresol                     | 4.65E-01 | 3.84E-01 | 3.86E-01 | 4.87E-01 | 4.22E-01 | 6.12E-01 | 5.68E-01 | 5.73E-01 | 4.70E-01 | 8.81E-03 **  |
| 3-hydroxy-butyric acid       | 5.32E-02 | 3.43E-02 | 3.54E-02 | 4.44E-02 | 4.00E-02 | 7.47E-02 | 7.26E-02 | 7.68E-02 | 6.00E-02 | 6.83E-04 *** |
| furanacetic acid             | 2.62E-02 | 1.46E-01 | 1.46E-01 | 4.44E-02 | 2.58E-02 | 1.75E-01 | 3.28E-02 | 2.39E-02 | 3.22E-02 | 8.02E-01     |
| 2-hydroxymethyl-butyric acid | 3.80E-01 | 2.68E-01 | 1.76E-01 | 3.49E-01 | 2.97E-01 | 2.99E+00 | 3.37E+00 | 3.79E+00 | 3.48E+00 | 1.58E-07 *** |

|                                     |          |          |          |          |          |          |          |          |          |          |    |
|-------------------------------------|----------|----------|----------|----------|----------|----------|----------|----------|----------|----------|----|
| benzoic acid                        | 5.11E-01 | 3.58E-01 | 3.58E-01 | 4.50E-01 | 3.66E-01 | 5.04E-01 | 4.61E-01 | 4.87E-01 | 3.69E-01 | 3.23E-01 |    |
| phenylacetic acid                   | 1.41E-01 | 1.01E-01 | 1.99E-01 | 1.20E-01 | 1.36E-01 | 3.82E-02 | 7.37E-02 | 1.19E-01 | 1.17E-01 | 7.70E-02 |    |
| 3-methyl-2-furancarboxylic acid     | 1.70E-01 | 1.33E-01 | 1.56E-01 | 2.03E-01 | 1.70E-01 | 2.43E-01 | 2.41E-01 | 2.04E-01 | 1.85E-01 | 2.35E-02 | *  |
| catechol                            | 4.68E+00 | 3.10E+00 | 3.13E+00 | 4.07E+00 | 3.27E+00 | 3.51E+00 | 3.35E+00 | 3.44E+00 | 2.75E+00 | 3.47E-01 |    |
| 2,3-dihydroxy-propionic acid        | 3.59E-01 | 2.84E-01 | 2.48E-01 | 2.74E-01 | 1.84E-01 | 1.78E-01 | 1.65E-01 | 1.84E-01 | 1.73E-01 | 2.18E-02 | *  |
| quinol/resorcinol                   | 1.16E-01 | 8.83E-02 | 8.28E-02 | 1.13E-01 | 8.84E-02 | 7.41E-02 | 6.83E-02 | 6.57E-02 | 5.46E-02 | 7.61E-03 | ** |
| 2-isopropyl-3-carbonyl-butyric acid | 4.77E+00 | 3.02E+00 | 2.91E+00 | 3.54E+00 | 2.68E+00 | 1.62E+00 | 1.44E+00 | 1.46E+00 | 1.26E+00 | 2.74E-03 | ** |
| malic acid                          | 1.56E-01 | 1.13E-01 | 8.20E-02 | 8.16E-02 | 7.61E-02 | 4.67E-02 | 2.67E-02 | 3.02E-02 | 4.77E-02 | 8.77E-03 | ** |
| 1,2,3-glycinol                      | 6.01E-01 | 4.48E-01 | 3.87E-01 | 5.19E-01 | 3.80E-01 | 2.80E-01 | 2.63E-01 | 2.56E-01 | 2.29E-01 | 3.37E-03 | ** |
| threonic acid                       | 1.56E+01 | 8.20E+00 | 2.59E+00 | 2.18E+00 | 1.79E+00 | 5.59E+00 | 5.37E+00 | 5.11E+00 | 4.31E+00 | 7.54E-01 |    |
| m-hydroxy-benzoic acid              | 7.43E-01 | 5.09E-01 | 4.79E-01 | 6.52E-01 | 4.66E-01 | 3.93E-01 | 3.52E-01 | 3.43E-01 | 3.01E-01 | 1.04E-02 | *  |
| vanillic acid                       | 2.72E-01 | 2.01E-01 | 1.69E-01 | 2.61E-01 | 2.10E-01 | 2.05E-01 | 1.83E-01 | 1.83E-01 | 1.43E-01 | 1.18E-01 |    |
| tetradecanoic acid                  | 6.40E-01 | 4.23E-01 | 3.17E-01 | 5.12E-01 | 3.89E-01 | 7.22E-01 | 7.39E-01 | 7.21E-01 | 5.44E-01 | 1.96E-02 | *  |
| palmitic acid                       | 4.25E+01 | 2.81E+01 | 2.55E+01 | 3.58E+01 | 2.88E+01 | 2.81E+01 | 2.57E+01 | 2.69E+01 | 2.05E+01 | 1.16E-01 |    |
| linoleic acid                       | 1.96E+01 | 1.30E+01 | 1.39E+01 | 1.74E+01 | 1.44E+01 | 1.43E+01 | 1.32E+01 | 1.38E+01 | 1.04E+01 | 1.30E-01 |    |
| linolenic acid                      | 1.49E+01 | 1.01E+01 | 1.03E+01 | 1.28E+01 | 1.04E+01 | 7.95E+00 | 6.90E+00 | 7.07E+00 | 5.50E+00 | 4.13E-03 | ** |
| oleic acid                          | 1.08E+01 | 7.32E+00 | 7.54E+00 | 9.71E+00 | 7.99E+00 | 7.92E+00 | 7.29E+00 | 7.66E+00 | 5.81E+00 | 1.29E-01 |    |
| octadecanoic acid                   | 1.07E+01 | 7.14E+00 | 7.42E+00 | 9.01E+00 | 7.40E+00 | 8.75E+00 | 7.47E+00 | 7.80E+00 | 5.83E+00 | 3.84E-01 |    |
| eicosanic acid                      | 3.72E+00 | 2.73E+00 | 3.06E+00 | 3.84E+00 | 3.15E+00 | 4.62E+00 | 4.23E+00 | 4.62E+00 | 3.46E+00 | 2.75E-02 | *  |

**Table S2.** Contents of the identified acids in the gaseous phase ( $\mu\text{g}/\text{mg}$  tar).

| Compounds               | L1       | L2       | L3       | L4       | L5       | M1       | M2       | M3       | M4       | <i>p</i> |     |
|-------------------------|----------|----------|----------|----------|----------|----------|----------|----------|----------|----------|-----|
| formic acid             | 3.15E-01 | 3.03E-01 | 2.76E-01 | 3.28E-01 | 2.06E-01 | 3.24E-01 | 5.23E-01 | 4.31E-01 | 5.22E-01 | 1.12E-02 | *   |
| acetic acid             | 1.19E+00 | 9.92E-01 | 7.18E-01 | 9.84E-01 | 9.27E-01 | 7.52E-01 | 7.43E-01 | 1.30E+00 | 6.43E-01 | 5.28E-01 |     |
| acrylic acid            | 1.19E-02 | 1.58E-02 | 9.80E-03 | 7.87E-03 | 5.43E-03 | 6.12E-03 | 9.38E-03 | 1.81E-02 | 7.34E-03 | 9.82E-01 |     |
| propionic acid          | 5.68E-02 | 5.39E-02 | 1.00E-01 | 5.29E-02 | 9.10E-02 | 3.53E-02 | 4.64E-01 | 2.95E-01 | 4.38E-02 | 1.76E-01 |     |
| 2-methyl-propionic acid | 6.79E-03 | 7.04E-03 | 7.45E-03 | 6.68E-03 | 8.86E-03 | 9.55E-03 | 1.69E-02 | 1.80E-02 | 8.93E-03 | 2.69E-02 | *   |
| 2-methyl-butyric acid   | 5.90E-04 | 1.30E-03 | 5.35E-04 | 4.94E-03 | 3.88E-03 | 3.08E-03 | 6.03E-03 | 3.61E-03 | 5.76E-03 | 9.37E-02 |     |
| 2-ene-butyric acid      | 1.57E-02 | 1.90E-02 | 2.57E-02 | 1.97E-02 | 2.14E-02 | 9.29E-03 | 3.18E-03 | 1.10E-02 | 3.85E-03 | 1.11E-03 | *** |
| 3-methyl-butyric acid   | 6.60E-03 | 6.52E-03 | 4.08E-03 | 5.99E-03 | 5.14E-03 | 6.69E-03 | 8.15E-03 | 8.42E-03 | 7.87E-03 | 1.24E-02 | *   |
| valeric acid            | 2.53E-03 | 3.02E-03 | 1.16E-02 | 2.19E-03 | 1.04E-02 | 1.38E-02 | 3.08E-02 | 3.05E-02 | 2.45E-03 | 7.76E-02 |     |

|                                     |          |          |          |          |          |          |          |          |          |          |     |
|-------------------------------------|----------|----------|----------|----------|----------|----------|----------|----------|----------|----------|-----|
| 2-methyl-2-ene-butyric acid         | 6.68E-03 | 7.62E-03 | 1.75E-02 | 8.08E-03 | 1.33E-02 | 2.92E-02 | 1.85E-02 | 1.76E-02 | 2.94E-03 | 2.65E-01 |     |
| 2-pentenoic acid                    | 1.12E-01 | 1.76E-01 | 9.14E-02 | 5.89E-02 | 1.42E-03 | 3.17E-02 | 1.56E-03 | 9.31E-04 | 1.00E-03 | 4.96E-02 | *   |
| 3-methyl-pentanoic acid             | 7.18E-04 | 8.93E-04 | 6.46E-04 | 5.05E-04 | 4.92E-04 | 2.14E-03 | 2.60E-03 | 2.39E-03 | 2.15E-03 | 3.58E-06 | *** |
| 4-methyl-pentanoic acid             | 6.16E-04 | 4.45E-04 | 5.43E-04 | 6.66E-04 | 4.31E-04 | 1.51E-03 | 7.62E-04 | 1.46E-03 | 1.49E-03 | 2.59E-03 | **  |
| phenol                              | 5.83E-03 | 7.91E-03 | 5.46E-03 | 5.11E-03 | 6.62E-03 | 6.91E-03 | 2.06E-02 | 1.65E-02 | 6.50E-03 | 7.96E-02 |     |
| lactic acid                         | 7.73E-03 | 1.20E-02 | 4.39E-02 | 4.90E-03 | 1.26E-02 | 1.57E-02 | 2.11E-02 | 1.70E-02 | 9.58E-03 | 9.63E-01 |     |
| caproic acid                        | 1.22E-02 | 1.41E-02 | 1.54E-02 | 1.11E-02 | 1.46E-02 | 3.01E-02 | 3.38E-02 | 3.33E-02 | 1.41E-02 | 1.10E-02 | *   |
| glycolic acid                       | 4.36E-03 | 3.32E-03 | 3.90E-03 | 2.26E-03 | 2.61E-03 | 5.55E-03 | 4.74E-03 | 4.60E-03 | 3.17E-03 | 8.92E-02 |     |
| 2-carbonyl-propionic acid           | 2.30E-03 | 5.90E-03 | 1.85E-03 | 9.04E-04 | 1.87E-03 | 3.11E-03 | 5.43E-04 | 1.77E-03 | 2.93E-04 | 3.49E-01 |     |
| 2-hydroxy-butyric acid              | 1.50E-03 | 1.36E-03 | 1.71E-03 | 8.86E-04 | 1.99E-03 | 9.59E-04 | 1.78E-03 | 1.43E-03 | 1.64E-03 | 8.96E-01 |     |
| levulinic acid                      | 1.76E-03 | 1.44E-03 | 3.26E-03 | 1.49E-03 | 3.11E-03 | 3.38E-03 | 4.13E-03 | 5.00E-03 | 3.13E-03 | 2.30E-02 | *   |
| o-cresol                            | 1.23E-03 | 1.37E-03 | 3.61E-04 | 1.22E-03 | 5.34E-04 | 1.00E-03 | 1.01E-03 | 6.09E-04 | 1.69E-03 | 6.74E-01 |     |
| 2-furancarboxylic acid              | 6.69E-04 | 2.85E-04 | 1.29E-03 | 5.96E-04 | 1.35E-03 | 1.18E-03 | 1.70E-03 | 7.62E-04 | 1.10E-03 | 2.70E-01 |     |
| 3-hydroxy-propionic acid            | 6.34E-02 | 1.64E-01 | 1.57E-02 | 1.14E-01 | 3.98E-02 | 2.46E-02 | 1.16E-01 | 9.21E-02 | 3.79E-02 | 7.54E-01 |     |
| p-cresol                            | 1.13E-03 | 1.52E-03 | 4.32E-04 | 9.73E-04 | 8.72E-04 | 9.07E-04 | 1.12E-03 | 1.02E-03 | 1.30E-03 | 6.48E-01 |     |
| 3-hydroxy-butyric acid              | 8.11E-03 | 1.01E-02 | 2.13E-03 | 1.17E-02 | 5.69E-03 | 5.55E-03 | 1.03E-02 | 7.66E-03 | 5.87E-03 | 9.26E-01 |     |
| furanacetic acid                    | 1.60E-03 | 1.77E-03 | 5.25E-03 | 9.47E-03 | 9.49E-03 | 5.31E-03 | 1.13E-02 | 9.95E-03 | 2.77E-03 | 5.15E-01 |     |
| 2-hydroxymethyl-butyric acid        | 1.63E-04 | 7.97E-05 | 2.26E-04 | 2.15E-05 | 3.54E-04 | 9.91E-04 | 6.96E-04 | 7.41E-04 | 1.27E-04 | 3.01E-02 | *   |
| benzoic acid                        | 7.56E-03 | 9.08E-03 | 2.21E-01 | 6.77E-03 | 5.86E-01 | 7.55E-01 | 2.27E-01 | 2.64E-01 | 7.93E-03 | 4.61E-01 |     |
| phenylacetic acid                   | 1.45E-02 | 4.91E-02 | 5.25E-03 | 7.57E-03 | 2.22E-02 | 6.76E-03 | 8.61E-03 | 1.52E-02 | 3.48E-02 | 7.60E-01 |     |
| 3-methyl-2-furancarboxylic acid     | 7.99E-03 | 8.00E-03 | 3.94E-03 | 9.47E-03 | 5.25E-02 | 2.39E-02 | 9.89E-03 | 1.91E-02 | 1.24E-02 | 9.97E-01 |     |
| catechol                            | 2.39E-05 | 3.02E-04 | 4.53E-04 | 1.15E-04 | 2.23E-04 | 1.81E-04 | 1.97E-04 | 1.98E-04 | 2.77E-04 | 9.14E-01 |     |
| 2,3-dihydroxy-propionic acid        | 6.72E-04 | 8.59E-04 | 6.26E-04 | 6.77E-04 | 8.99E-04 | 1.38E-03 | 1.17E-03 | 4.75E-03 | 9.91E-04 | 1.37E-01 |     |
| quinol/resorcinol                   | 7.52E-05 | 2.12E-05 | 1.36E-05 | 7.88E-05 | 6.82E-05 | 8.28E-05 | 1.93E-04 | 1.03E-04 | 1.00E-04 | 3.87E-02 | *   |
| 2-isopropyl-3-carbonyl-butyric acid | 6.79E-03 | 9.89E-03 | 3.94E-03 | 1.89E-03 | 9.49E-03 | 2.66E-03 | 6.91E-03 | 2.82E-03 | 2.77E-03 | 2.30E-01 |     |
| malic acid                          | 5.86E-04 | 8.88E-04 | 3.08E-04 | 2.96E-04 | 2.91E-04 | 2.08E-03 | 4.90E-04 | 6.74E-04 | 9.37E-04 | 1.37E-01 |     |
| 1,2,3-glycinol                      | 5.87E-05 | 9.49E-05 | 3.62E-05 | 5.22E-05 | 3.51E-05 | 4.65E-05 | 7.75E-05 | 8.98E-05 | 1.39E-04 | 1.61E-01 |     |
| threonic acid                       | 1.04E-02 | 3.89E-02 | 2.10E-02 | 2.27E-02 | 2.33E-02 | 5.79E-03 | 2.70E-02 | 1.79E-02 | 2.52E-02 | 5.41E-01 |     |
| m-hydroxy-benzoic acid              | 3.52E-04 | 4.55E-04 | 2.67E-04 | 6.10E-04 | 5.40E-04 | 2.78E-04 | 4.50E-04 | 7.92E-04 | 3.69E-04 | 8.27E-01 |     |
| vanillic acid                       | 5.29E-04 | 4.14E-04 | 5.11E-05 | 7.38E-04 | 2.52E-04 | 2.35E-04 | 5.48E-04 | 5.56E-04 | 7.52E-04 | 4.65E-01 |     |
| tetradecanoic acid                  | 1.64E-02 | 2.43E-02 | 8.59E-03 | 2.29E-02 | 1.10E-02 | 1.11E-02 | 8.53E-03 | 1.35E-02 | 1.51E-02 | 2.61E-01 |     |

|                   |          |          |          |          |          |          |          |          |          |          |   |
|-------------------|----------|----------|----------|----------|----------|----------|----------|----------|----------|----------|---|
| palmitic acid     | 3.93E+00 | 5.57E+00 | 3.39E+00 | 5.48E+00 | 3.95E+00 | 1.52E+00 | 1.19E+00 | 4.49E+00 | 4.29E+00 | 1.28E-01 |   |
| linoleic acid     | 1.51E-02 | 1.37E-02 | 1.18E-02 | 7.57E-03 | 7.44E-03 | 6.27E-03 | 1.26E-02 | 1.28E-02 | 9.74E-03 | 7.38E-01 |   |
| linolenic acid    | 5.00E-03 | 9.33E-03 | 8.22E-03 | 5.93E-03 | 1.81E-02 | 6.79E-03 | 1.33E-02 | 1.02E-02 | 1.15E-02 | 7.10E-01 |   |
| oleic acid        | 4.55E-02 | 2.72E-02 | 2.82E-02 | 4.22E-02 | 2.67E-02 | 1.68E-02 | 3.50E-02 | 3.35E-02 | 2.89E-02 | 3.86E-01 |   |
| octadecanoic acid | 2.38E+00 | 3.13E+00 | 2.44E+00 | 2.86E+00 | 2.33E+00 | 8.90E-01 | 7.42E-01 | 1.89E+00 | 2.15E+00 | 1.14E-02 | * |
| eicosanic acid    | 2.29E-02 | 3.44E-02 | 1.79E-02 | 5.10E-02 | 2.56E-02 | 2.55E-02 | 2.62E-02 | 5.83E-02 | 4.26E-02 | 4.37E-01 |   |

**Table S3.** VIP values of individual acid.

| Var ID (Primary)                    | M10.VIP[1+1+0] | 2.44693 * M10.VIP[1]cvSE |
|-------------------------------------|----------------|--------------------------|
| 3-methyl-pentanoic acid             | 1.27029        | 0.22596                  |
| 2-methyl-butyric acid               | 1.26227        | 0.307044                 |
| 3-hydroxy-propionic acid            | 1.25293        | 0.242651                 |
| 2-hydroxymethyl-butyric acid        | 1.2416         | 0.316905                 |
| 2-carbonyl-propionic acid           | 1.22251        | 0.242543                 |
| 3-hydroxy-butyric acid              | 1.21667        | 0.335142                 |
| 3-methyl-butyric acid               | 1.21605        | 0.358808                 |
| 4-methyl-pentanoic acid             | 1.20864        | 0.434382                 |
| glycolic acid                       | 1.19307        | 0.349361                 |
| o-cresol                            | 1.17788        | 0.390014                 |
| 2-isopropyl-3-carbonyl-butyric acid | 1.16794        | 0.435098                 |
| 2-methyl-propionic acid             | 1.16763        | 0.495594                 |
| 1,2,3-glycinol                      | 1.14422        | 0.38421                  |
| malic acid                          | 1.13427        | 0.750753                 |
| p-cresol                            | 1.13007        | 0.487997                 |
| linolenic acid                      | 1.114          | 0.33429                  |
| tetradecanoic acid                  | 1.0961         | 0.591086                 |
| valeric acid                        | 1.09425        | 0.46804                  |
| caproic acid                        | 1.08899        | 0.677116                 |
| m-hydroxy-benzoic acid              | 1.08861        | 0.456993                 |
| 2,3-dihydroxy-propionic acid        | 1.07676        | 0.559148                 |
| quinol/resorcinol                   | 1.0578         | 0.351918                 |
| eicosanic acid                      | 1.0549         | 0.32148                  |
| 3-methyl-2-furancarboxylic acid     | 1.01631        | 0.740374                 |
| 2-furancarboxylic acid              | 0.970357       | 0.661947                 |
| lactic acid                         | 0.968582       | 0.475798                 |
| levulinic acid                      | 0.955007       | 0.505668                 |
| palmitic acid                       | 0.899147       | 0.650947                 |
| 2-ene-butyric acid                  | 0.89363        | 0.570761                 |
| acrylic acid                        | 0.862408       | 0.940461                 |

---

|                             |          |          |
|-----------------------------|----------|----------|
| phenylacetic acid           | 0.850113 | 1.08538  |
| linoleic acid               | 0.846137 | 0.496376 |
| oleic acid                  | 0.846094 | 0.517931 |
| benzoic acid                | 0.83886  | 0.542979 |
| phenol                      | 0.821893 | 0.506262 |
| vanillic acid               | 0.815894 | 0.586388 |
| formic acid                 | 0.797337 | 1.11156  |
| catechol                    | 0.777314 | 0.804984 |
| acetic acid                 | 0.750705 | 0.698727 |
| octadecanoic acid           | 0.742762 | 0.632192 |
| threonic acid               | 0.728659 | 0.974063 |
| 2-pentenoic acid            | 0.693931 | 0.447611 |
| 2-methyl-2-ene-butyric acid | 0.674098 | 0.460869 |
| 2-hydroxy-butyric acid      | 0.636833 | 0.580799 |
| propionic acid              | 0.561501 | 0.318195 |
| furanacetic acid            | 0.190775 | 0.866551 |
